# Supplementary material for: Ultrafast carrier recombination in a BC6N/SnXY Z-scheme heterostructure for water splitting: insights from ground- and excited-state carrier dynamics
Source: Royal Society of Chemistry journal article supplement (doi:10.1039/d4ta02440k), 2024-01-01
Supplement: d4ta02440k1.pdf [file d4ta02440k1.pdf]

## Ultrafast carrier recombination in BC<sub>6</sub>N/SnXY Z-scheme heterostructure for water splitting: insights from ground- and excited-state carrier dynamics

Jingshan Zong<sup>1</sup>, Cheng He<sup>2,\*</sup>, Wenxue Zhang<sup>1,\*</sup>

<sup>1</sup>*School of Materials Science and Engineering, Chang'an University, Xi'an 710064, China*

<sup>2</sup>*State Key Laboratory for Mechanical Behavior of Materials, School of Materials Science and Engineering, Xi'an Jiaotong University, Xi'an 710049, Shaanxi, China*

\*Corresponding Authors. Email: [hecheng@mail.xjtu.edu.cn](mailto:hecheng@mail.xjtu.edu.cn)

\*Corresponding Authors. Email: [wxzhang@chd.edu.cn](mailto:wxzhang@chd.edu.cn)

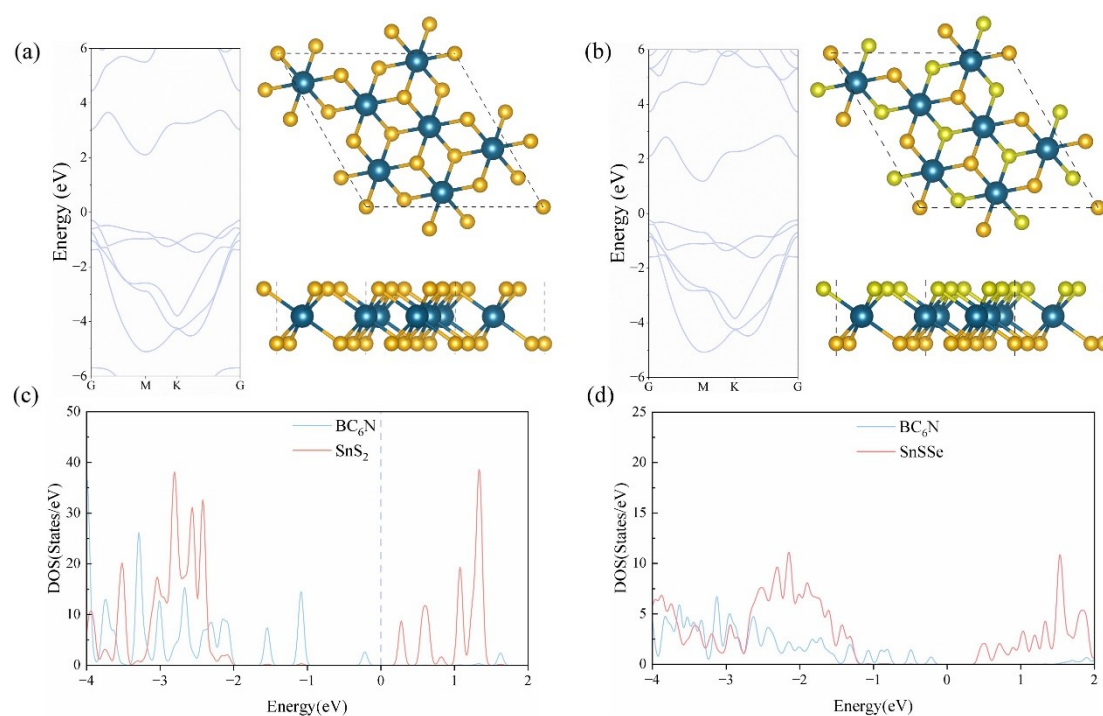

**Fig. S1** The band structure and structure diagram of (a)BC<sub>6</sub>N/SnS<sub>2</sub> and (b) BC<sub>6</sub>N/SnSSe. The calculated of corresponding DOS for monolayers in heterojunction of (c) BC<sub>6</sub>N/SnS<sub>2</sub> and (d) BC<sub>6</sub>N/SnSSe.

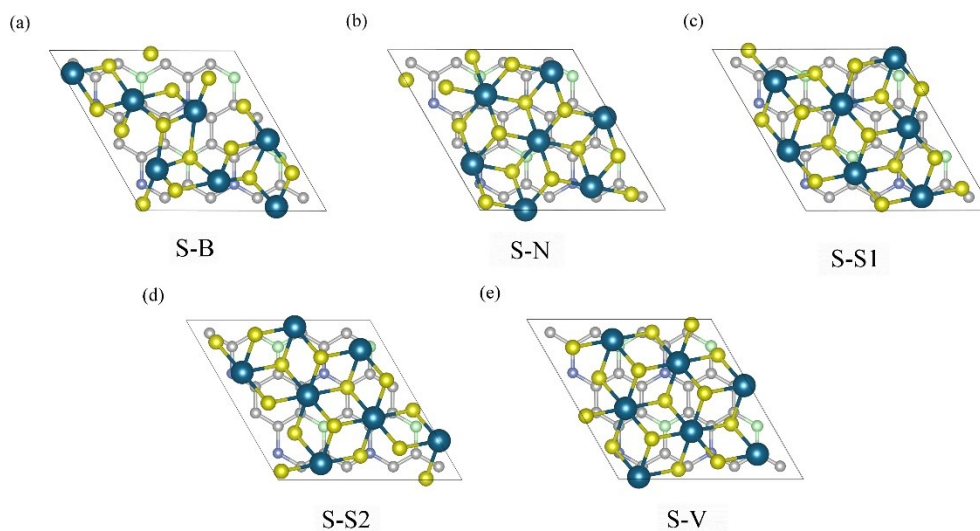

**Fig. S2** The different stacking configuration for  $BC_6N/SnXY$

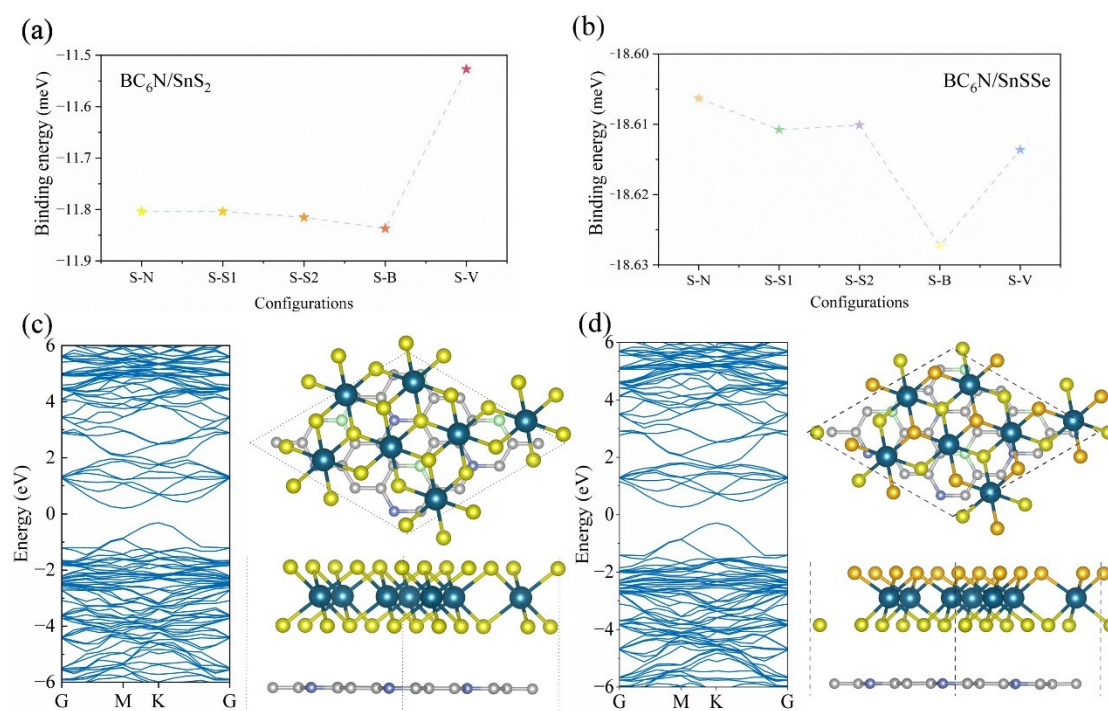

**Fig. S3** The binding energy of (a)  $BC_6N/SnS_2$  and (b)  $BC_6N/SnSSe$ . (c)(d) are the band structure and structural schematic for  $BC_6N/SnSe_2$  and  $BC_6N/SnSSe$ .

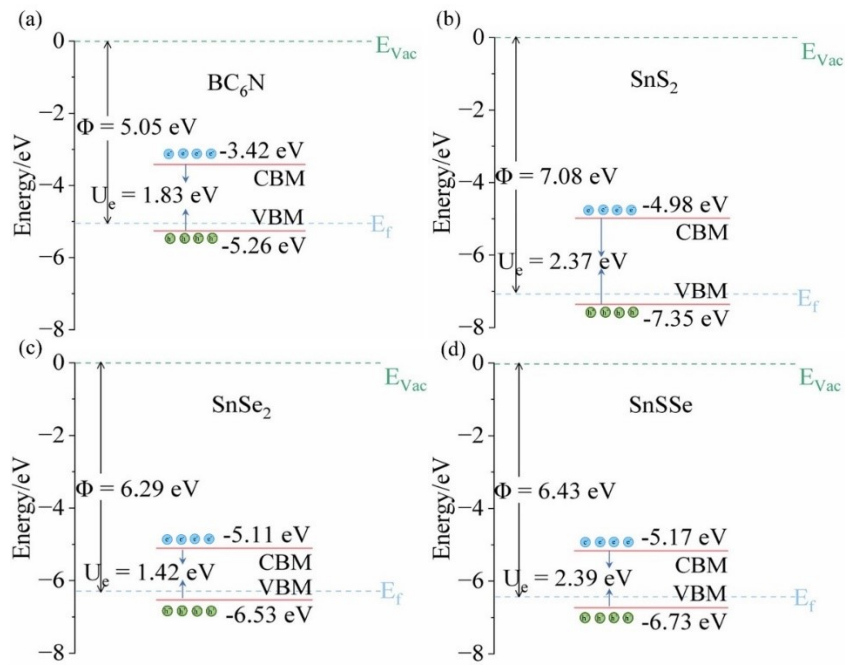

**Fig. S4** The band alignment of  $BC_6N$  and  $SnXY$  monolayers.

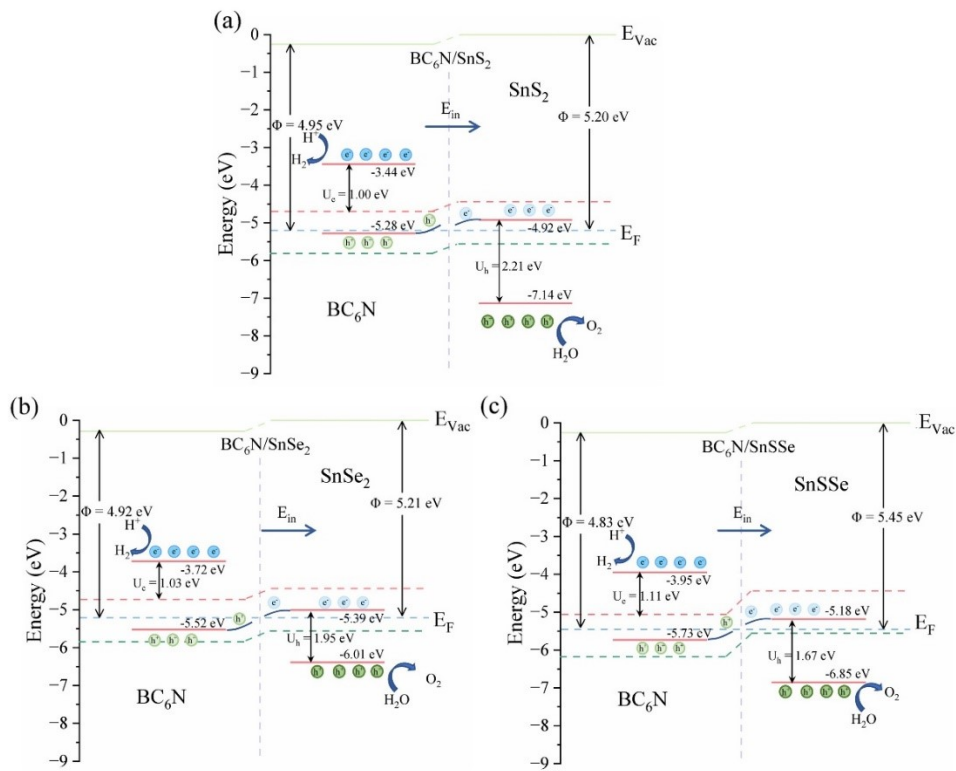

**Fig. S5** The band alignment of (a)  $BC_6N/SnS_2$ , (b)  $BC_6N/SnSe_2$  and (c)  $BC_6N/SnSSe$  heterojunction. Here,  $\Phi$  (work function) represent the difference of vacuum and Fermi level.

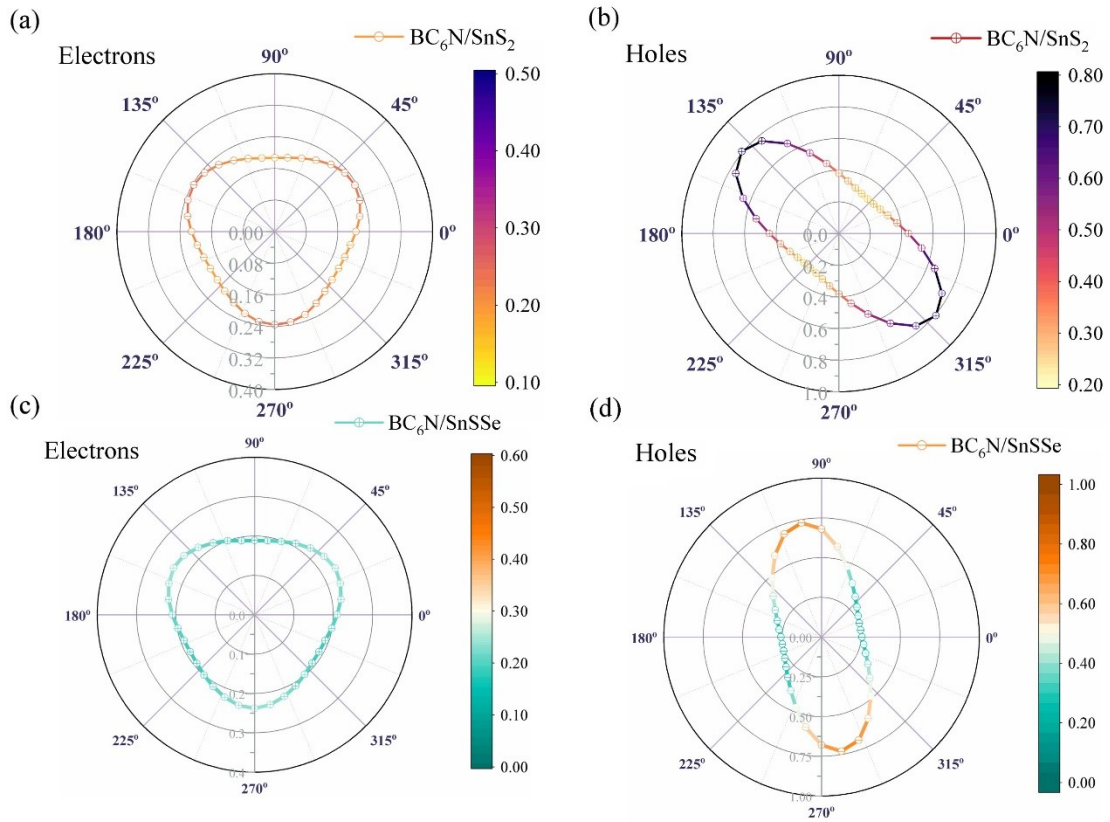

**Fig. S6** The angular dispersion of hole effective mass for BC<sub>6</sub>N/SnS<sub>2</sub> and BC<sub>6</sub>N/SnSSe.

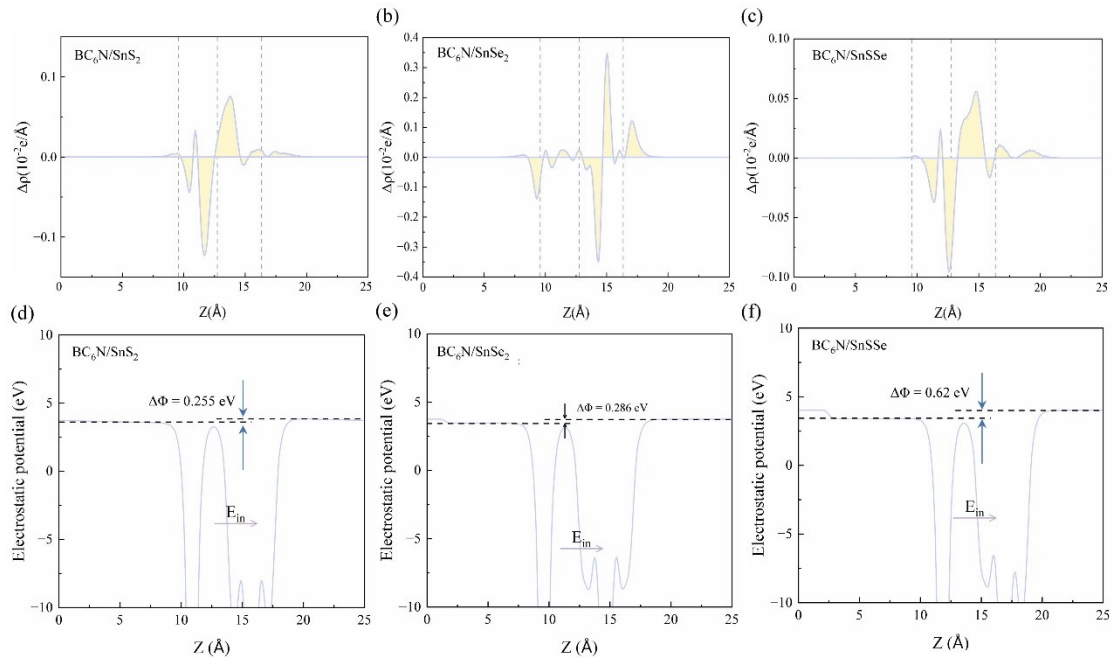

**Fig. S7** The calculated average charge density difference and electronic potential for three kinds of heterojunctions.

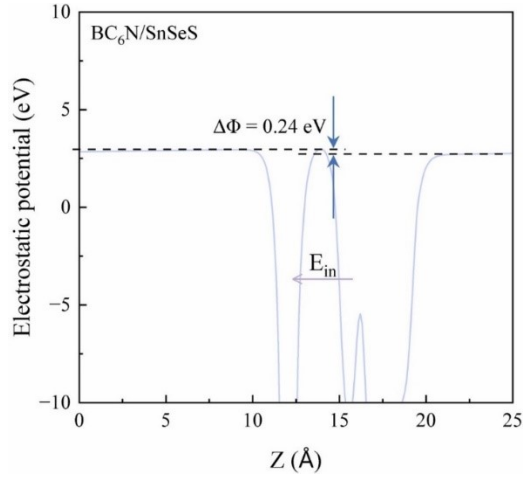

**Fig. S8** The calculated average electronic potential for BC<sub>6</sub>N/SnSeS.

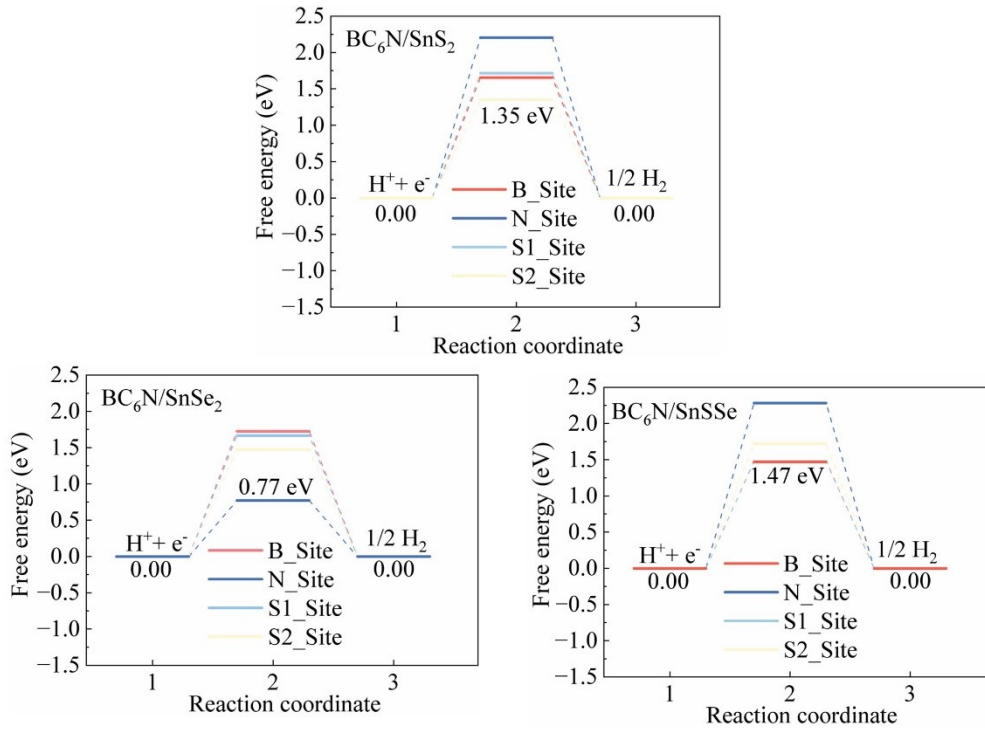

**Fig. S9** The calculated free energy changes of HER for different adsorption sites on BC<sub>6</sub>N/SnXY

**Table S1** The structural parameters of monolayers materials

| Monolayers        | $\alpha$ (Å) | $\beta$ (Å) | $d_{C-C}$ | $d_{C-B}$ | $d_{B-N}$ | $d_{Sn-S}$ | $d_{Sn-Se}$ | $\Phi$ (eV) | $E_g^{HSE}$ (eV) |
|-------------------|--------------|-------------|-----------|-----------|-----------|------------|-------------|-------------|------------------|
| BC <sub>6</sub> N | 4.975        | 4.975       | 1.416     | 1.475     | 1.456     | —          | —           | 5.05        | 1.83             |
| SnS <sub>2</sub>  | 3.663        | 3.663       | —         | —         | —         | 2.583      | —           | 7.08        | 2.39             |
| SnSe <sub>2</sub> | 3.823        | 3.823       | —         | —         | —         | —          | 2.730       | 6.43        | 1.42             |
| SnSSe             | 3.740        | 3.740       | —         | —         | —         | 2.611      | 2.704       | 6.29        | 1.56             |

**Table S2** The interlayer distances of BC<sub>6</sub>N/SnXY heterostructure

| Monolayers                          | X-B   | X-S1  | X-S2  | X-N   | X-V   |
|-------------------------------------|-------|-------|-------|-------|-------|
| BC <sub>6</sub> N/ SnS <sub>2</sub> | 3.378 | 3.432 | 3.413 | 3.383 | 3.338 |
| BC <sub>6</sub> N/SnSe <sub>2</sub> | 3.325 | 3.421 | 3.450 | 3.384 | 3.456 |
| BC <sub>6</sub> N/SnSSe             | 3.408 | 3.483 | 3.447 | 3.446 | 3.426 |

**The Gibbs free energy**

The method proposed by Nørskov was used to calculate the Gibbs free energy ( $\Delta G$ ), and the formula for every elemental step was shown below:

$$\Delta G = \Delta E + \Delta E_{ZPE} - T\Delta S \quad (1)$$

where  $\Delta E$  is the electronic energy difference between the reactants and products,  $\Delta E_{ZPE}$  and  $\Delta S$  are the variation of the zero-point energy and entropy at room temperature (T = 298.15 K), respectively.
